# Supplementary material for: Antiviral Drugs Screening for Swine Acute Diarrhea Syndrome Coronavirus
Source: MDPI journal article supplement (doi:10.3390/ijms231911250), 2022-09-24
Supplement: s1 [file s1]

**Figure S1 Cytopathic effects of SADS-CoV infection in the presence of the five drugs.**

Methylene blue (1.5625  $\mu$ M), mycophenolate mofetil (12.5  $\mu$ M), mycophenolic acid (12.5  $\mu$ M), gemcitabine (6.25  $\mu$ M) and cepharanthine (6.25  $\mu$ M) were separately added at different stages of SADS-CoV infection. The representative images of CPE on Huh7 cells after 48 hpi were shown.

**Figure S2 The effect of cepharanthine on SADS-CoV growth after virus entry.**

Cepharanthine (6.25  $\mu$ M) was added after SADS-CoV entry and the supernatant samples were collected to assess the virus growth by qPCR.

**Figure S3 The effects of gemcitabine, mycophenolate mofetil and mycophenolic acid on SADS-CoV binding and internalization.**

Gemcitabine, mycophenolate mofetil and mycophenolic acid were tested the effects on SADS-CoV binding (A–C) and internalization (D–F). The experiments were repeated at least twice. Error bars represent  $\pm 1$  SD; ns, not significant.

**Figure S4 Original images for western blotting assays in main figures.**

**Table S1 Antiviral activity of mycophenolate mofetil and mycophenolic acid.**

Previous studies were described about mycophenolate mofetil and mycophenolic acid against other viruses. -: Not test

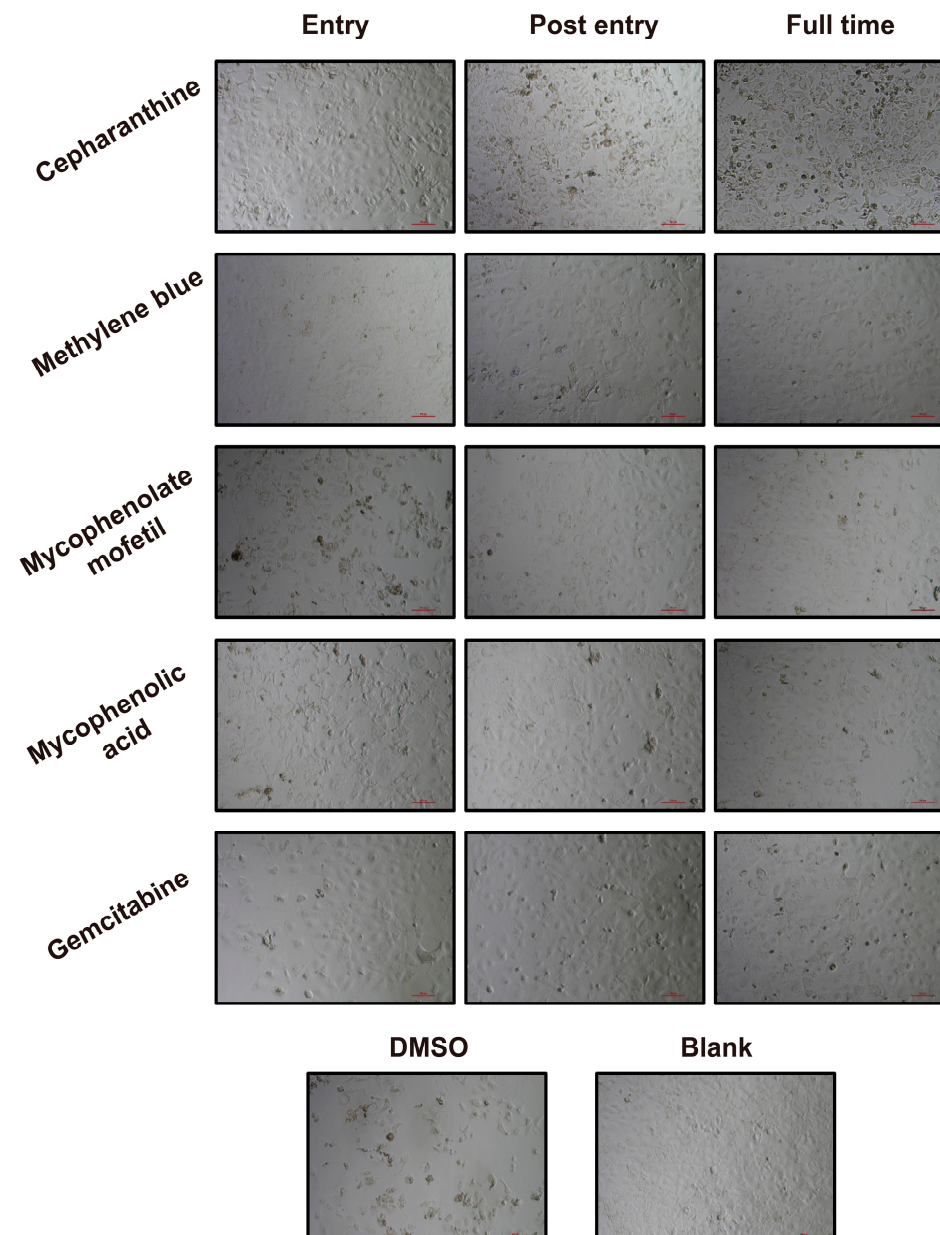

Figure S1. Cytopathic effects of SADS-CoV infection in the presence of the five drugs.

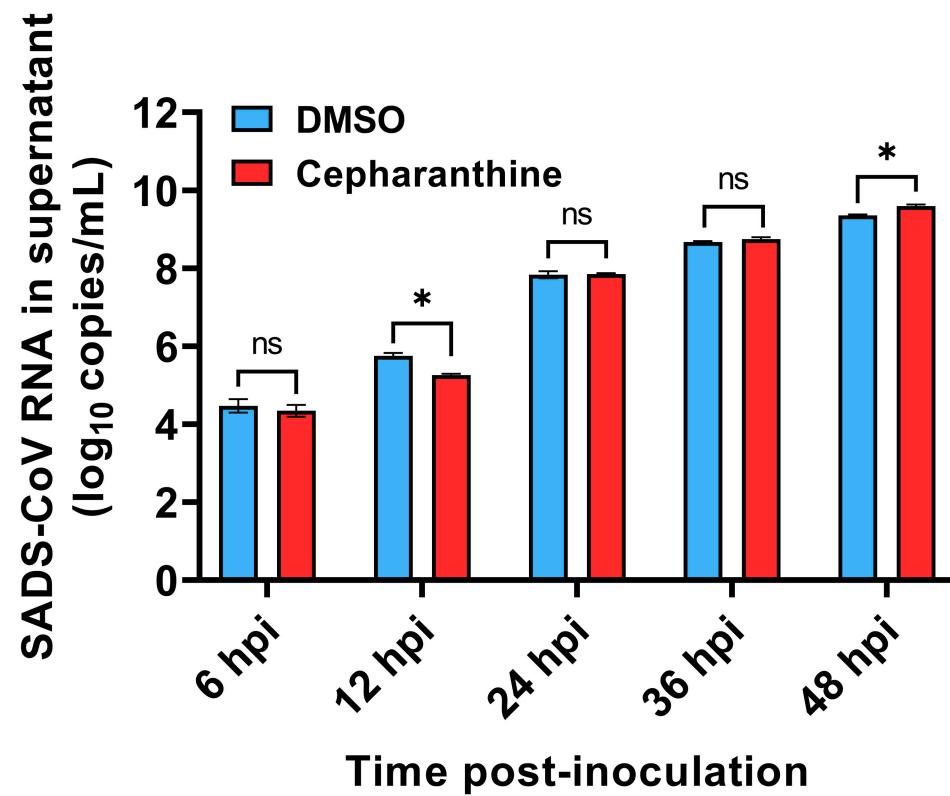

Figure S2. The effect of cepharanthine on SADS-CoV growth after virus entry.

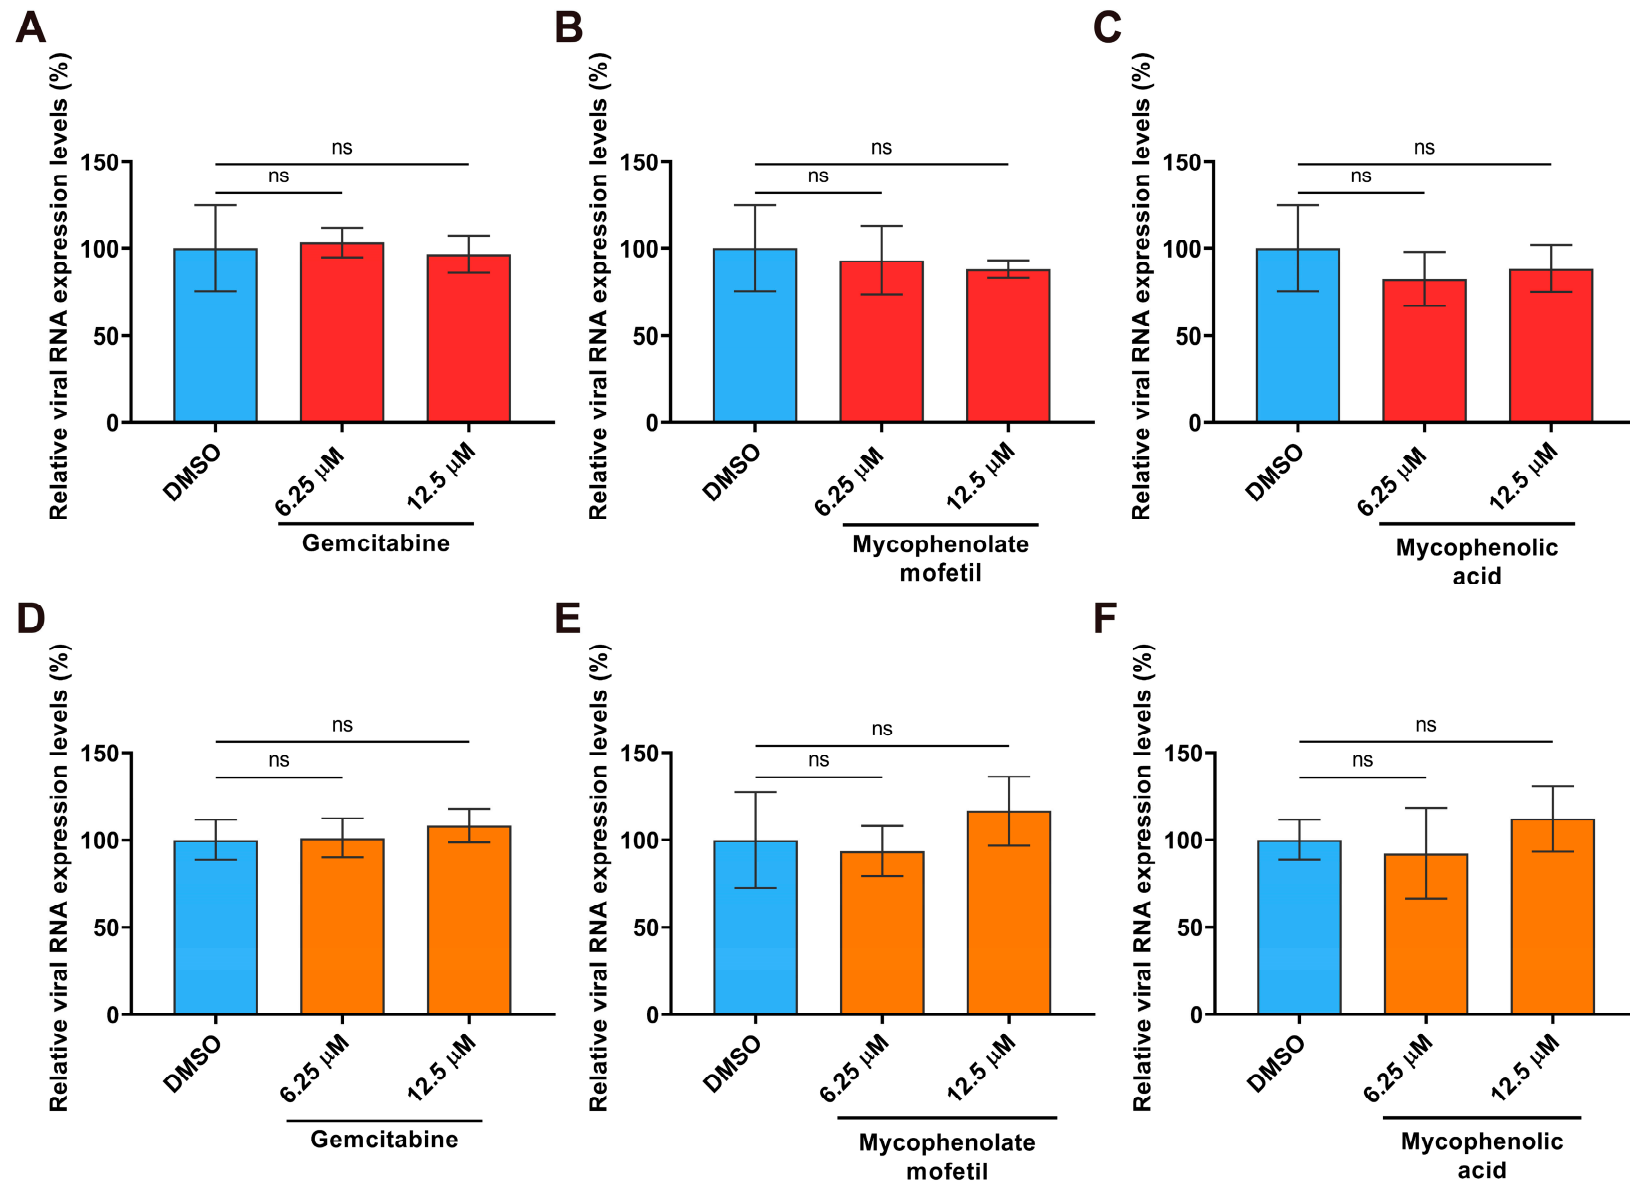

Figure S3. The effects of gemcitabine, mycophenolate mofetil and mycophenolic acid on SADS-CoV binding and internalization.

Figure 6A

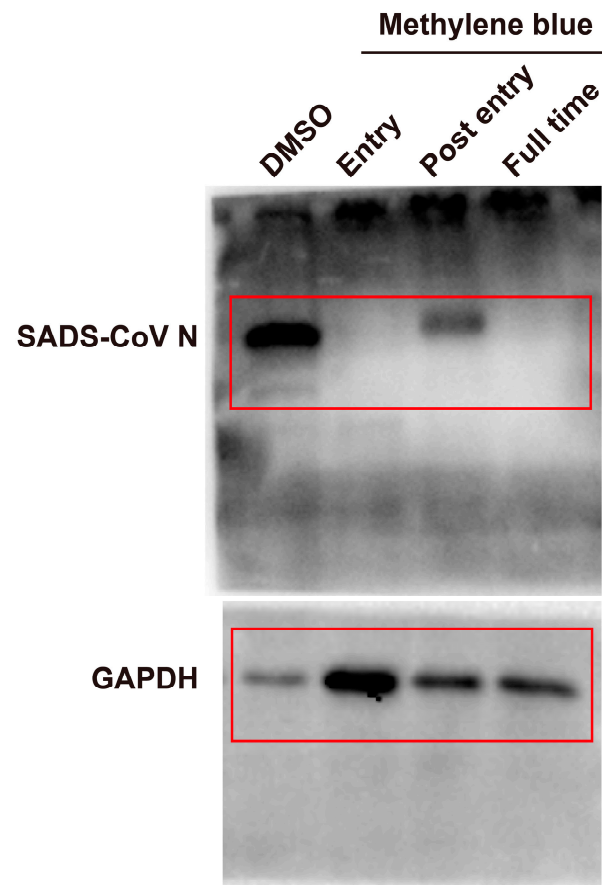

Figure 7A

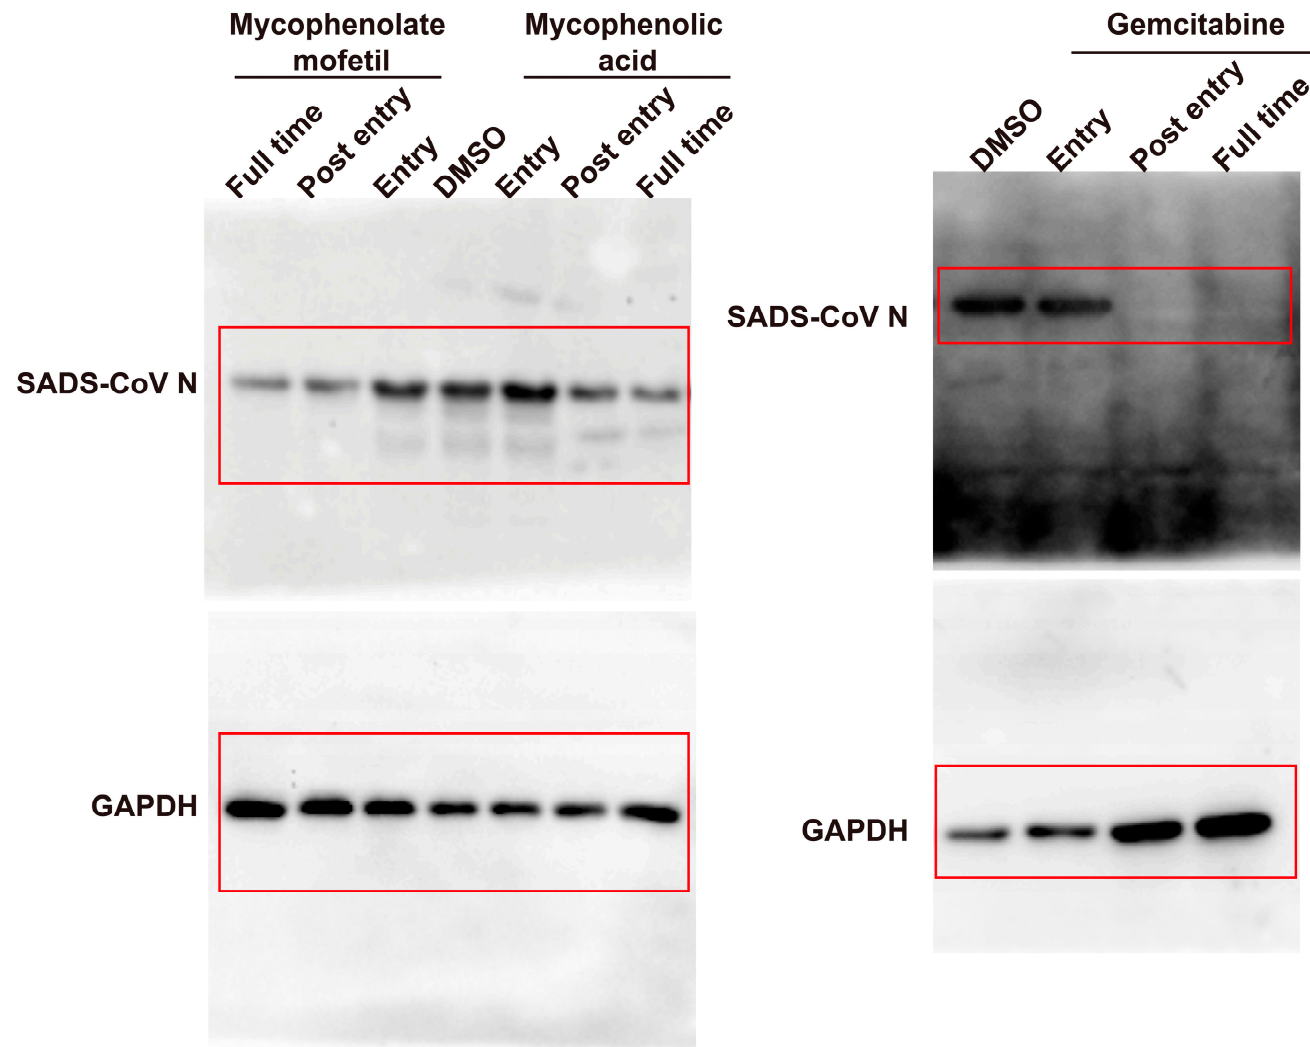

Figure S4. Original images for western blotting assays in main figures.

**Table S1. Antiviral activity of mycophenolate mofetil and mycophenolic acid against several viruses.**

**-: Not test**

| <b>Virus</b>              | <b>Mycophenolate</b>                                   | <b>Mycophenolic</b>                                    |
|---------------------------|--------------------------------------------------------|--------------------------------------------------------|
|                           | <b>mofetil</b>                                         | <b>acid</b>                                            |
|                           | <b>EC<sub>50</sub> (μM) /<br/>CC<sub>50</sub> (μM)</b> | <b>EC<sub>50</sub> (μM) /<br/>CC<sub>50</sub> (μM)</b> |
| <b>HCoV-OC43</b><br>[30]  | <b>1.58 / 3.43</b>                                     | <b>1.95 / 3.55</b>                                     |
| <b>HCoV-NL63</b><br>[30]  | <b>0.23 / 3.01</b>                                     | <b>0.18 / 3.44</b>                                     |
| <b>MERS-CoV</b><br>[30]   | <b>1.54 / 3.17</b>                                     | <b>1.95 / 3.21</b>                                     |
| <b>SARS-CoV</b><br>[31]   | <b>-</b>                                               | <b>&gt;30 / &gt;30</b>                                 |
| <b>SARS-CoV-2</b><br>[32] | <b>-</b>                                               | <b>0.87 / -</b>                                        |

## References

30. Shen, L.; Niu, J.; Wang, C.; Huang, B.; Wang, W.; Zhu, N.; Deng, Y.; Wang, H.; Ye, F.; Cen, S.; Tan, W. High-Throughput Screening and Identification of Potent Broad-Spectrum Inhibitors of Coronaviruses. *J. Virol.* **2019**, *93*.
31. Barnard, D.L.; Day, C.W.; Bailey, K.; Heiner, M.; Montgomery, R.; Lauridsen, L.; Winslow, S.; Hoopes, J.; Li, J.K.; Lee, J.; Carson, D.A.; Cottam, H.B.; Sidwell, R.W. Enhancement of the infectivity of SARS-CoV in BALB/c mice by IMP dehydrogenase inhibitors, including ribavirin. *Antiviral Res.* **2006**, *71*, 53-63.
32. Kato, F.; Matsuyama, S.; Kawase, M.; Hishiki, T.; Katoh, H.; Takeda, M. Antiviral activities of mycophenolic acid and IMD-0354 against SARS-CoV-2. *Microbiol. Immunol.* **2020**, *64*, 635-639.
